# Supplementary material for: Evaluation of vertically resolved longwave radiation in SPARTACUS-Surface 0.7.3 and the sensitivity to urban surface temperatures
Source: Copernicus journal article supplement (doi:10.5194/egusphere-2022-1002), 2023-01-09
Supplement: Supplementary file 1 [file egusphere-2022-1002-supplement.pdf]

# Supplementary material for: Evaluation of vertically resolved longwave radiation in SPARTACUS-Urban and the sensitivity to urban surface temperatures

Megan A. Stretton<sup>1</sup>, William Morrison<sup>1,2</sup>, Robin J. Hogan<sup>1,3</sup>, Sue Grimmond<sup>1</sup>,

5 <sup>1</sup>Department of Meteorology, University of Reading, Reading, UK

<sup>2</sup>Chair of Environmental Meteorology, Faculty of Environment and Natural Resources, University of Freiburg, Freiburg, Germany

<sup>3</sup>European Centre for Medium-Range Weather Forecasts, Reading, UK

*Correspondence to:* Megan A. Stretton (m.stretton@pgr.reading.ac.uk)

## 10 1 Supplementary Material

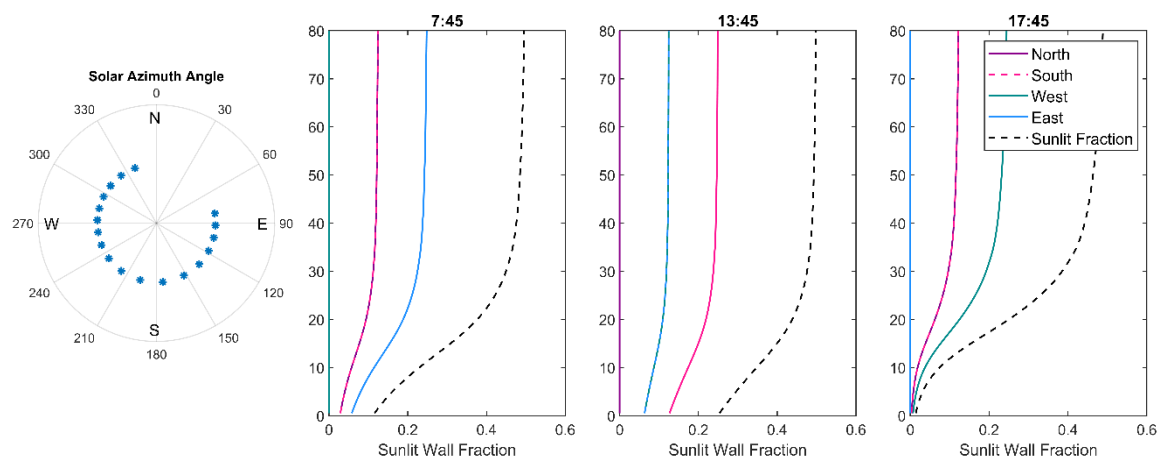

**Figure SM 1: Demonstration of the  $T_{wall}$  averaging method used for SPARTACUS-Urban simulations where facets are prescribed a temperature range**

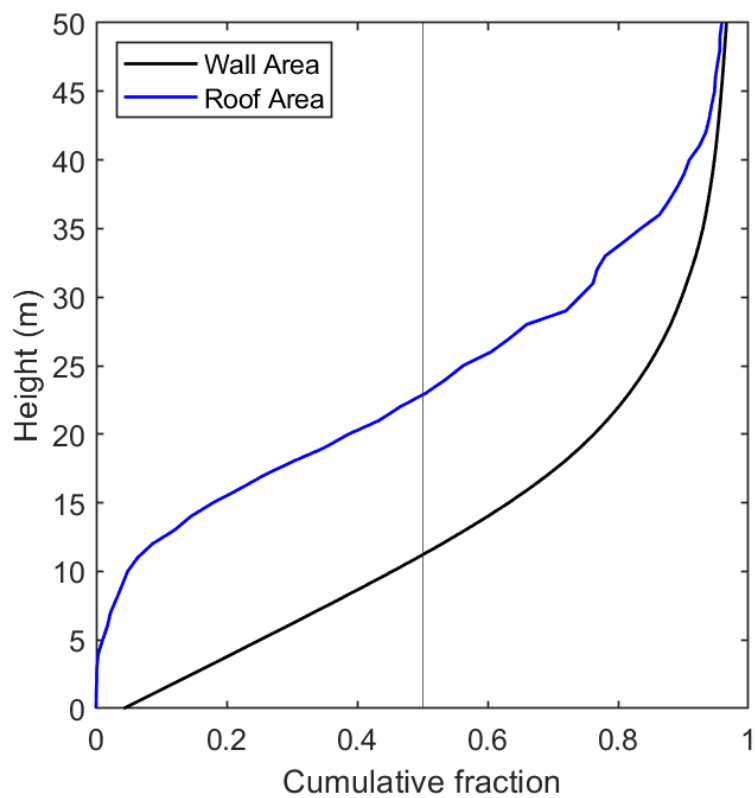

15

**Figure SM 2: Cumulative fractions of wall and roof area with height**

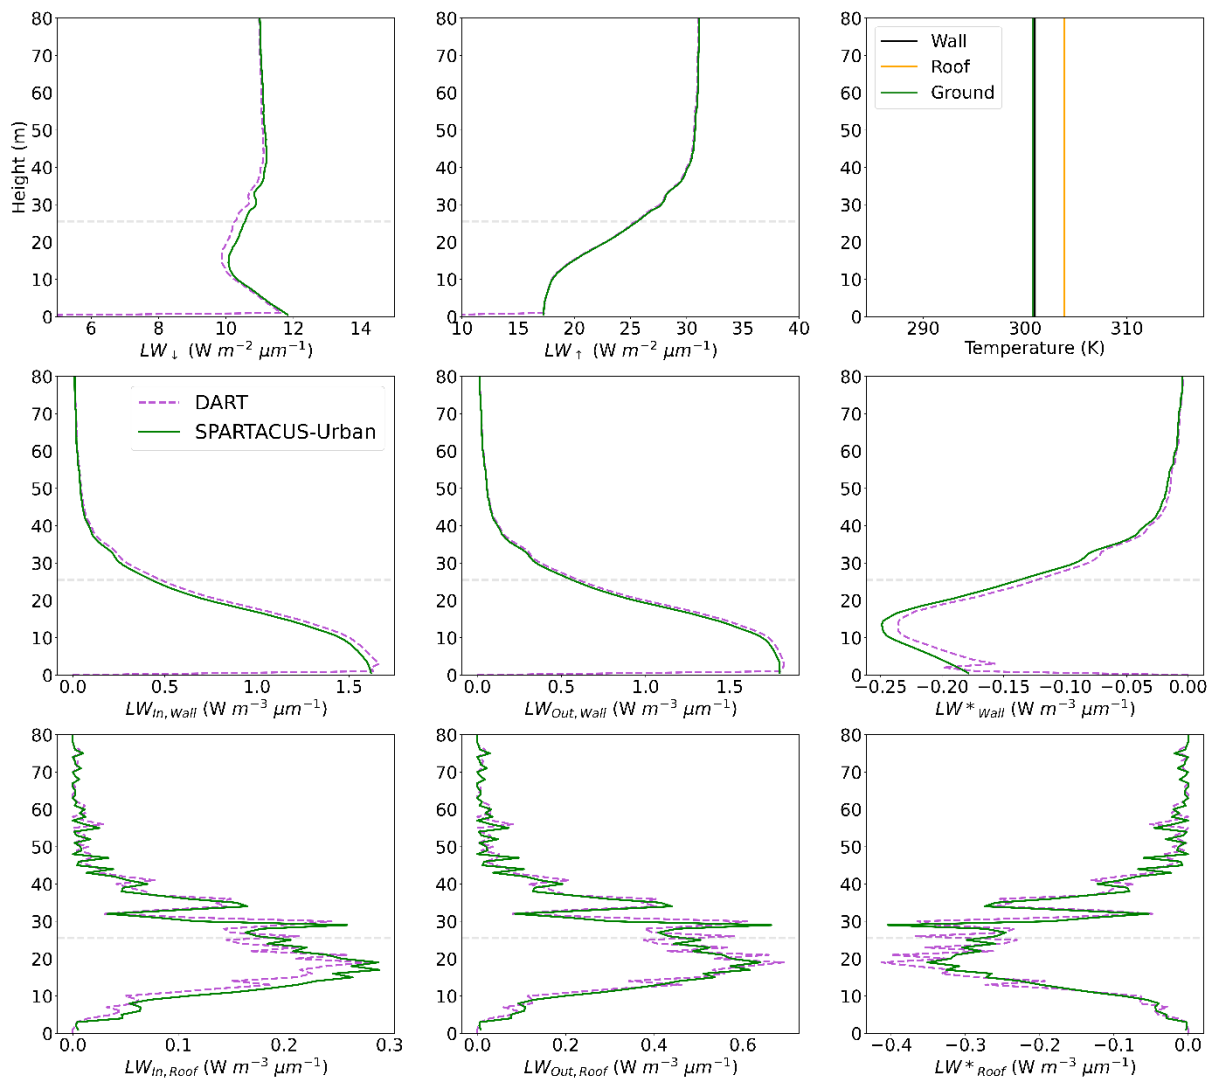

**Figure SM 3: As Figure 6 but for 7:45 UTC**

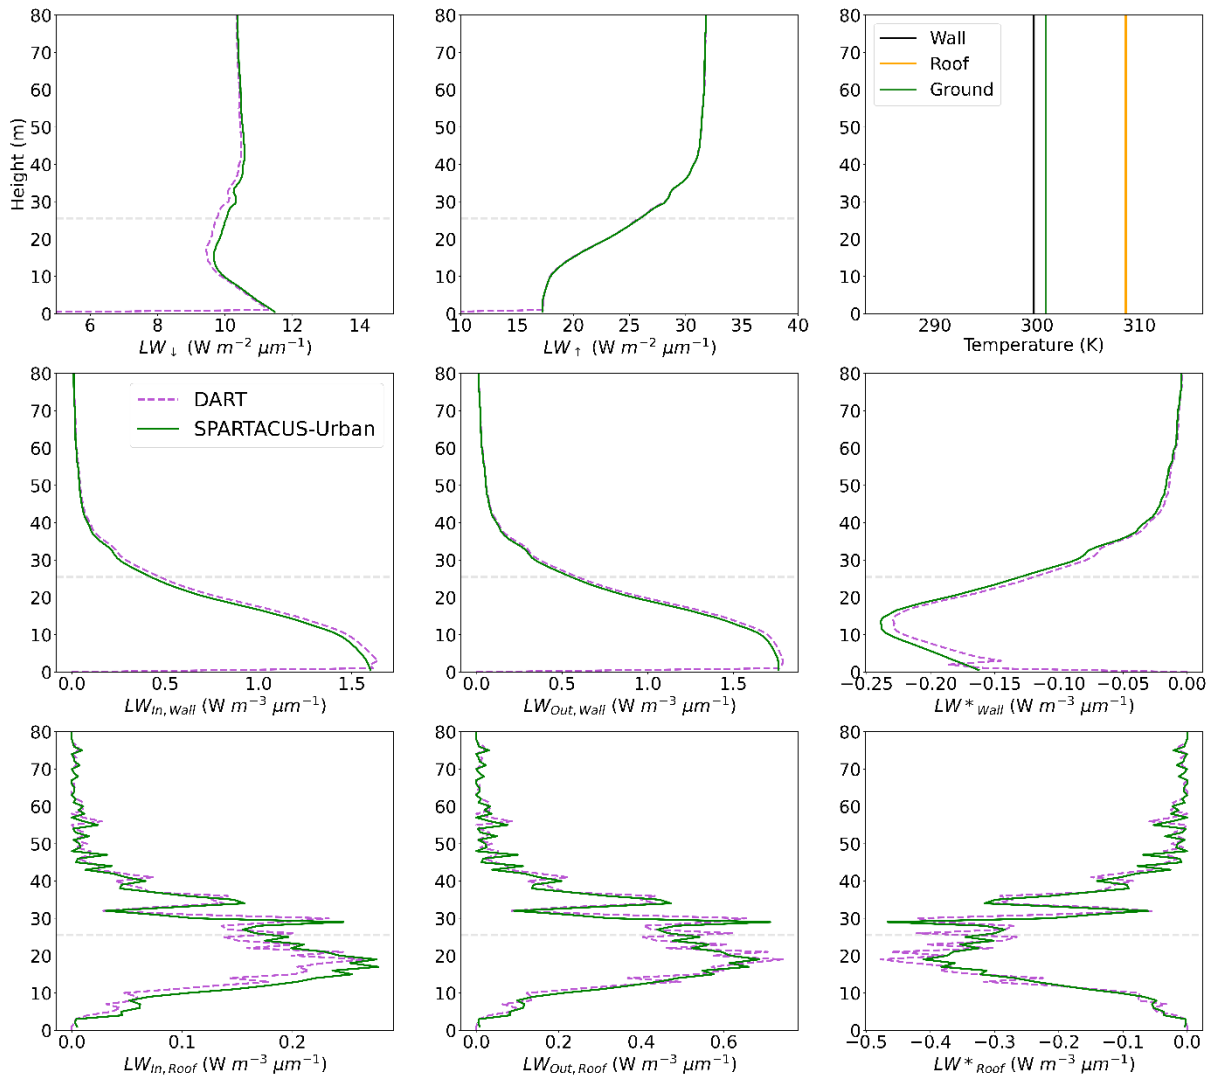

Figure SM 4: As Figure 6 but for 9:45 UTC

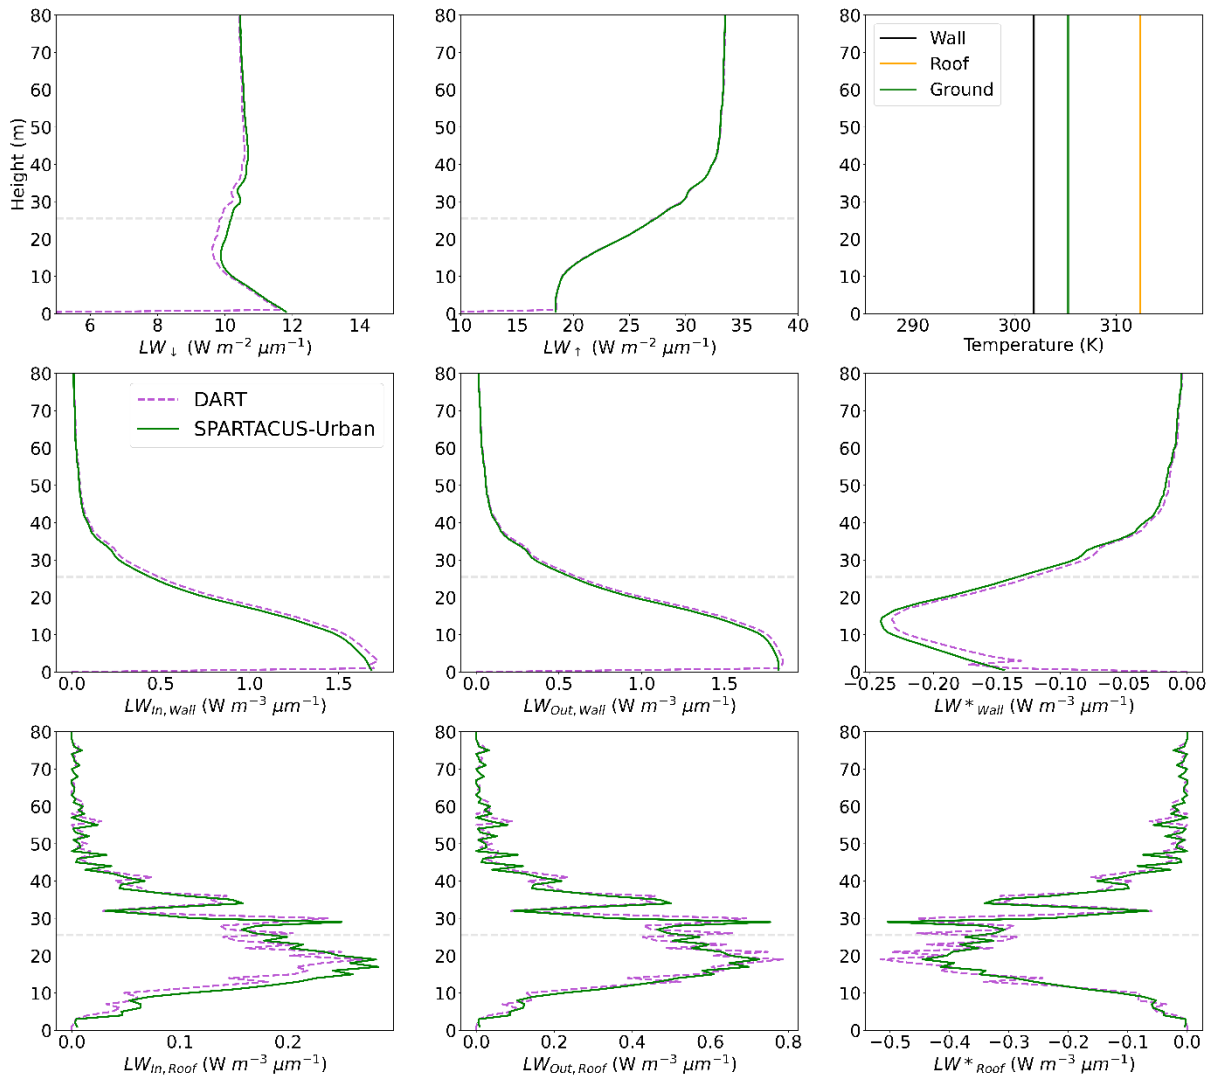

Figure SM 5: As Figure 6 but for 11:45 UTC

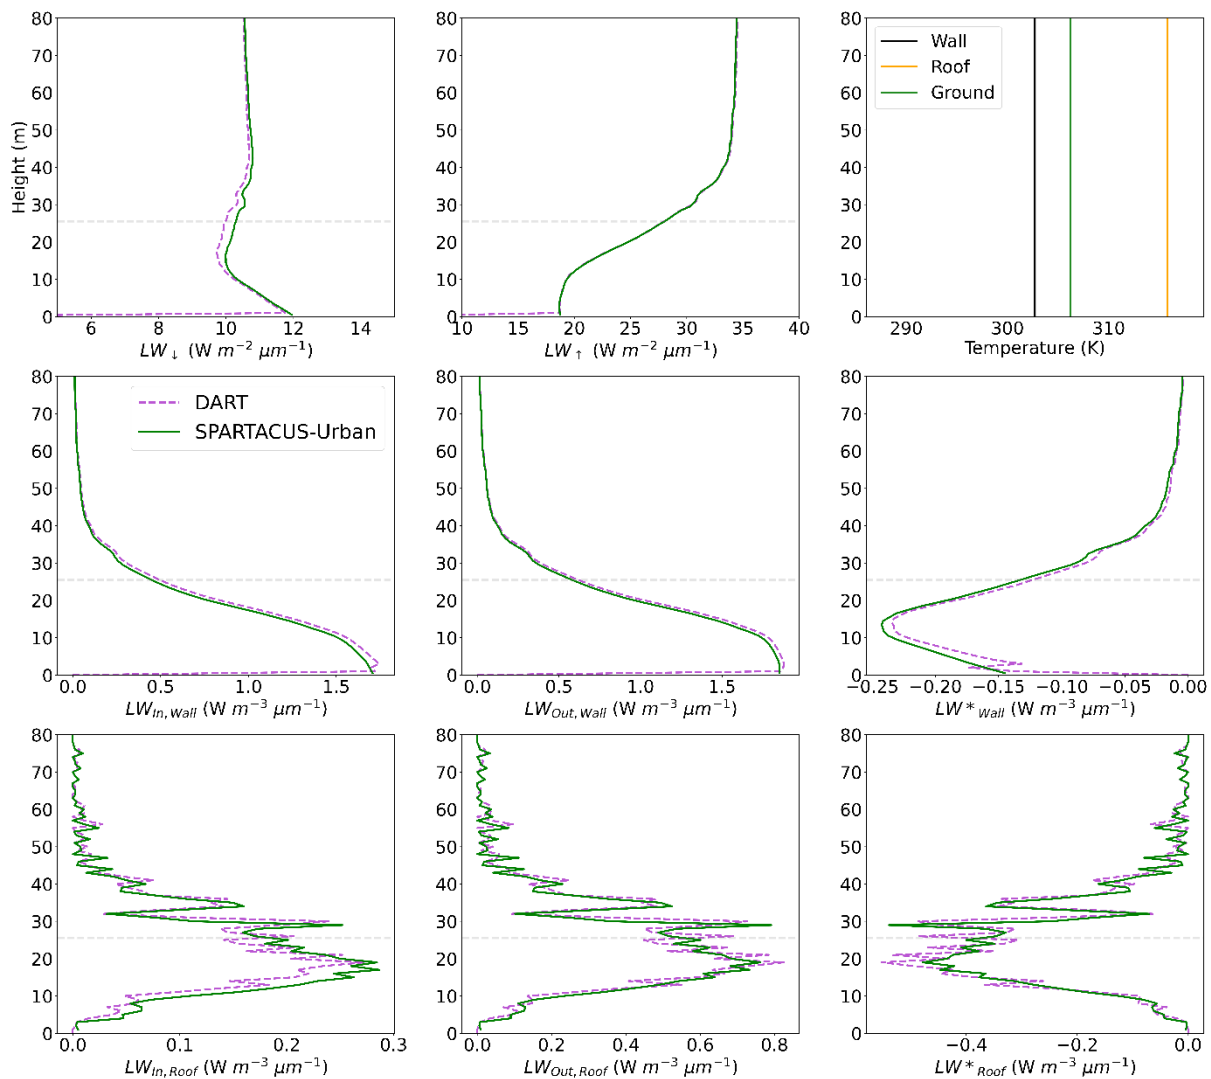

**Figure SM 6:** As Figure 6 but for 13:45 UTC

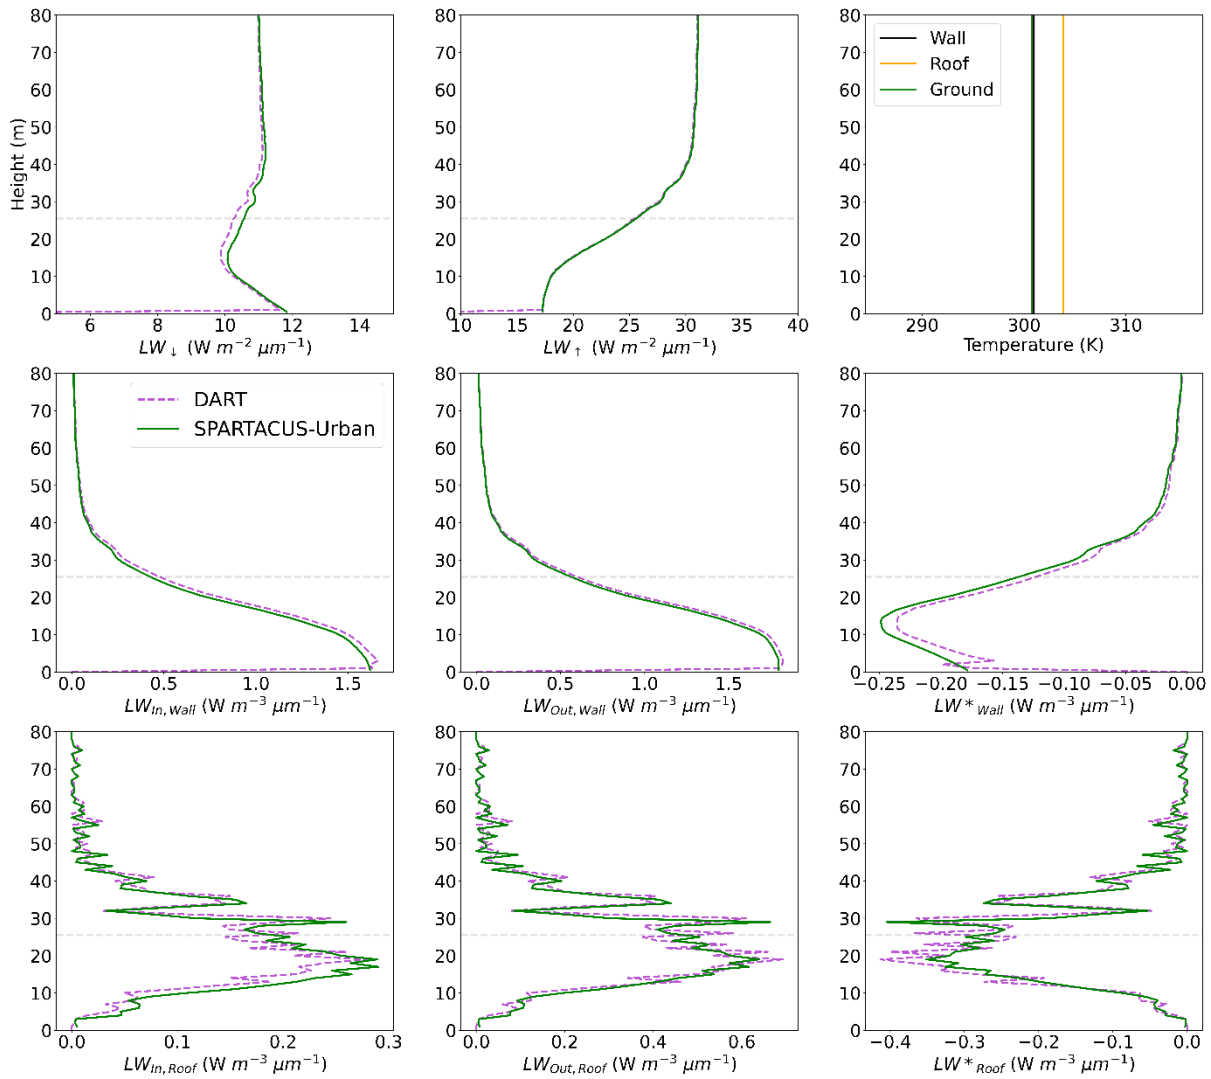

30 **Figure SM 7:** As Figure 6 but for 17:45 UTC

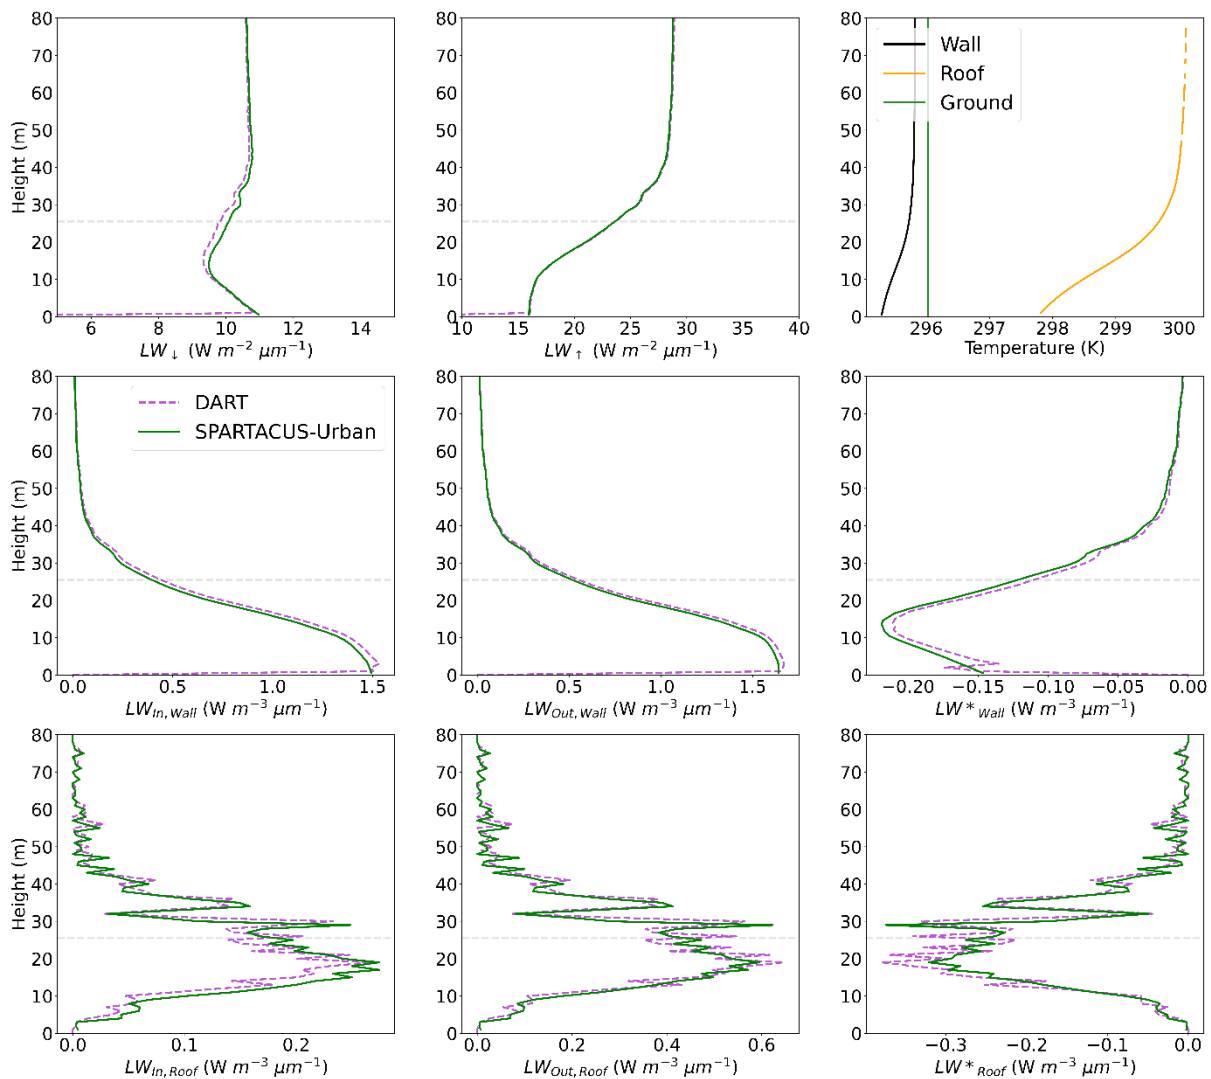

Figure SM 8: As Figure 7 but for 7:45 UTC



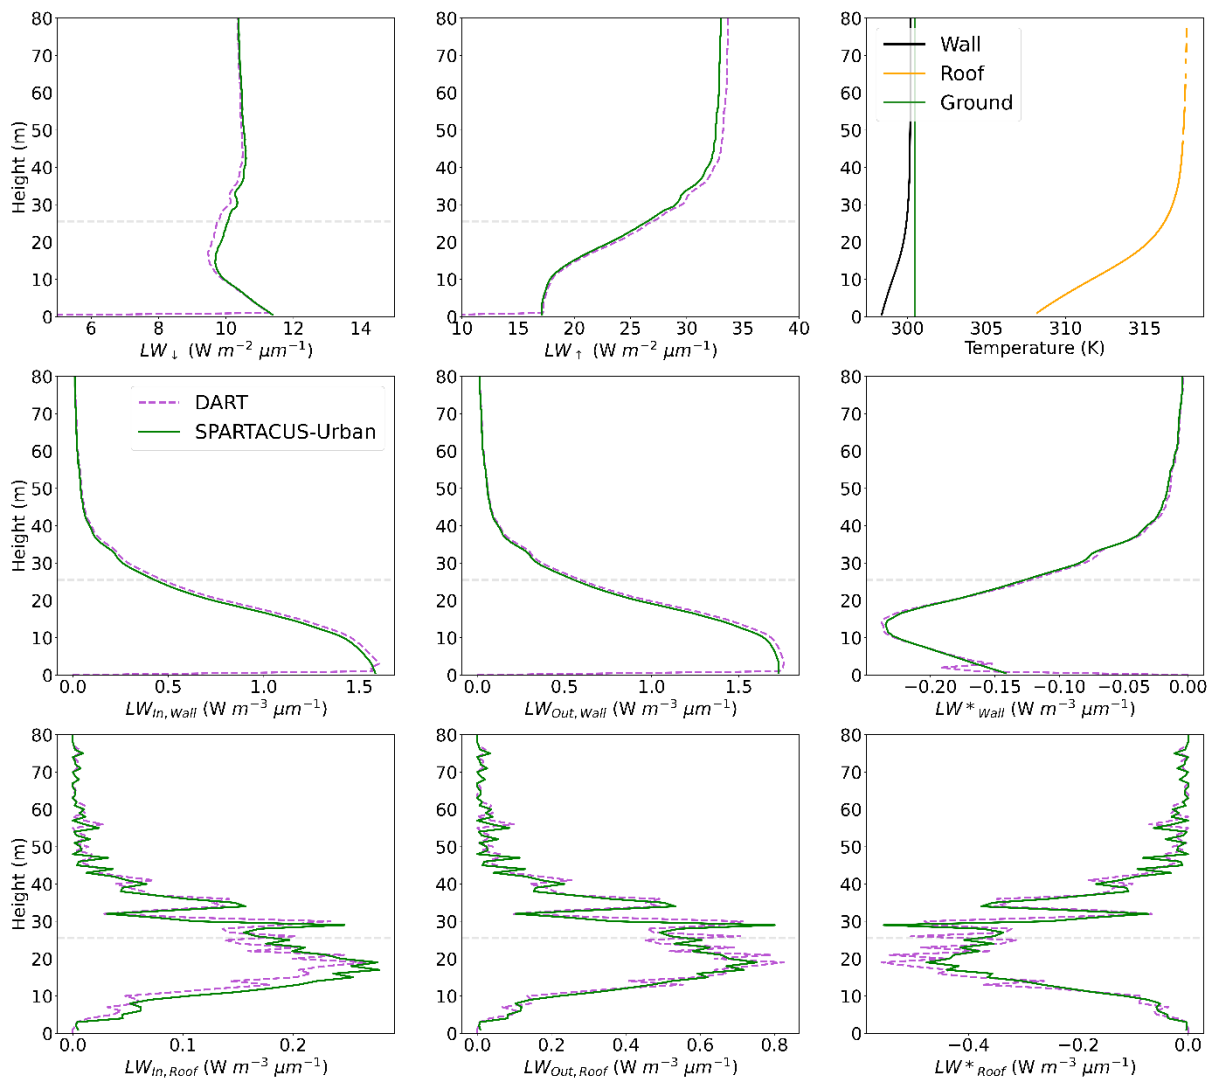

Figure SM 9: As Figure 7 but for 9:45 UTC

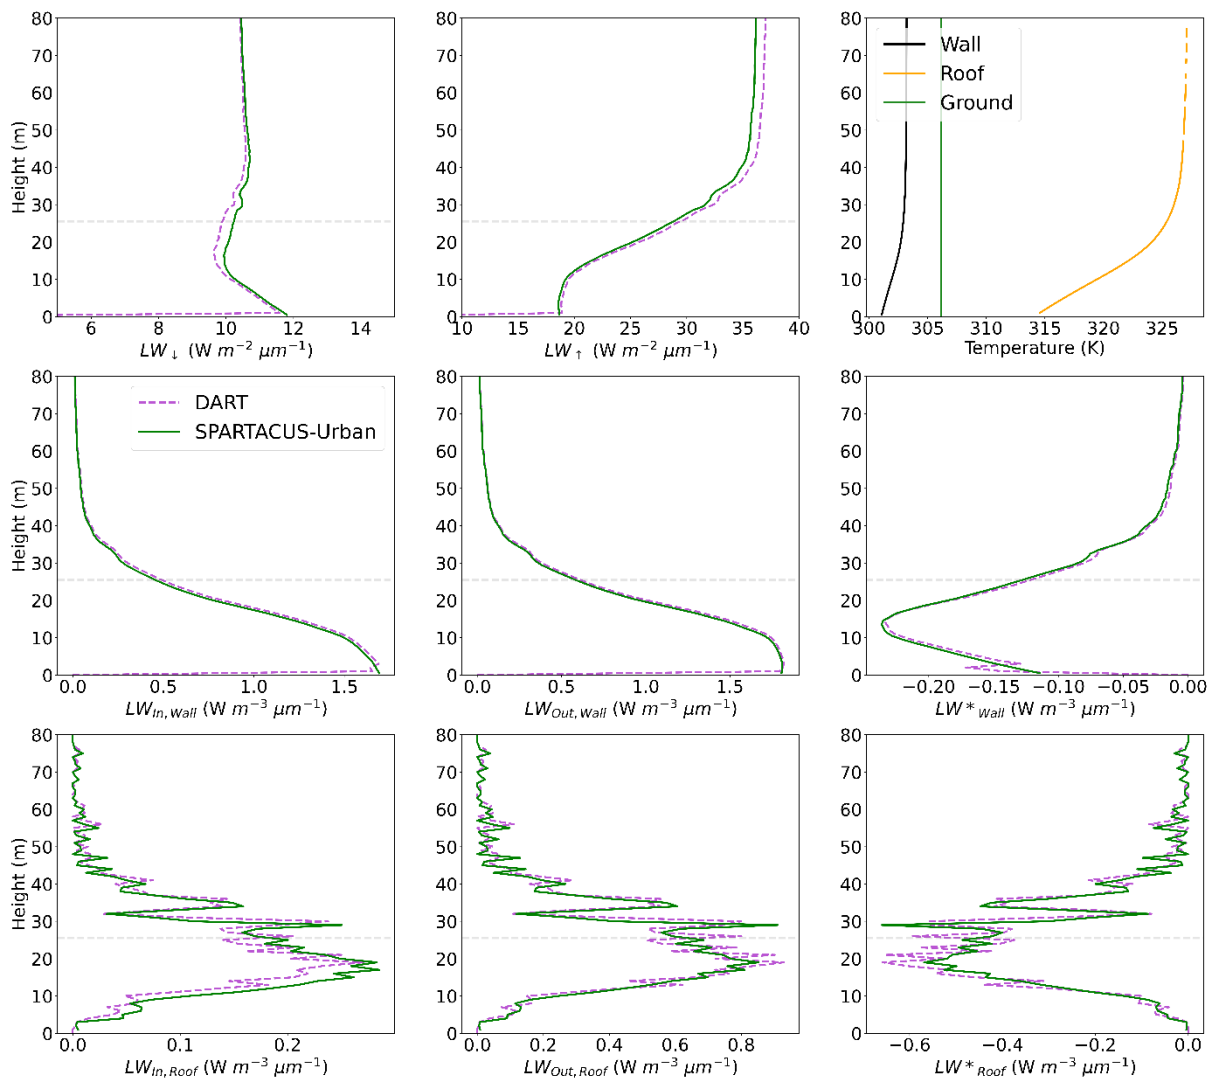

**Figure SM 10:** As Figure 7 but for 11:45 UTC

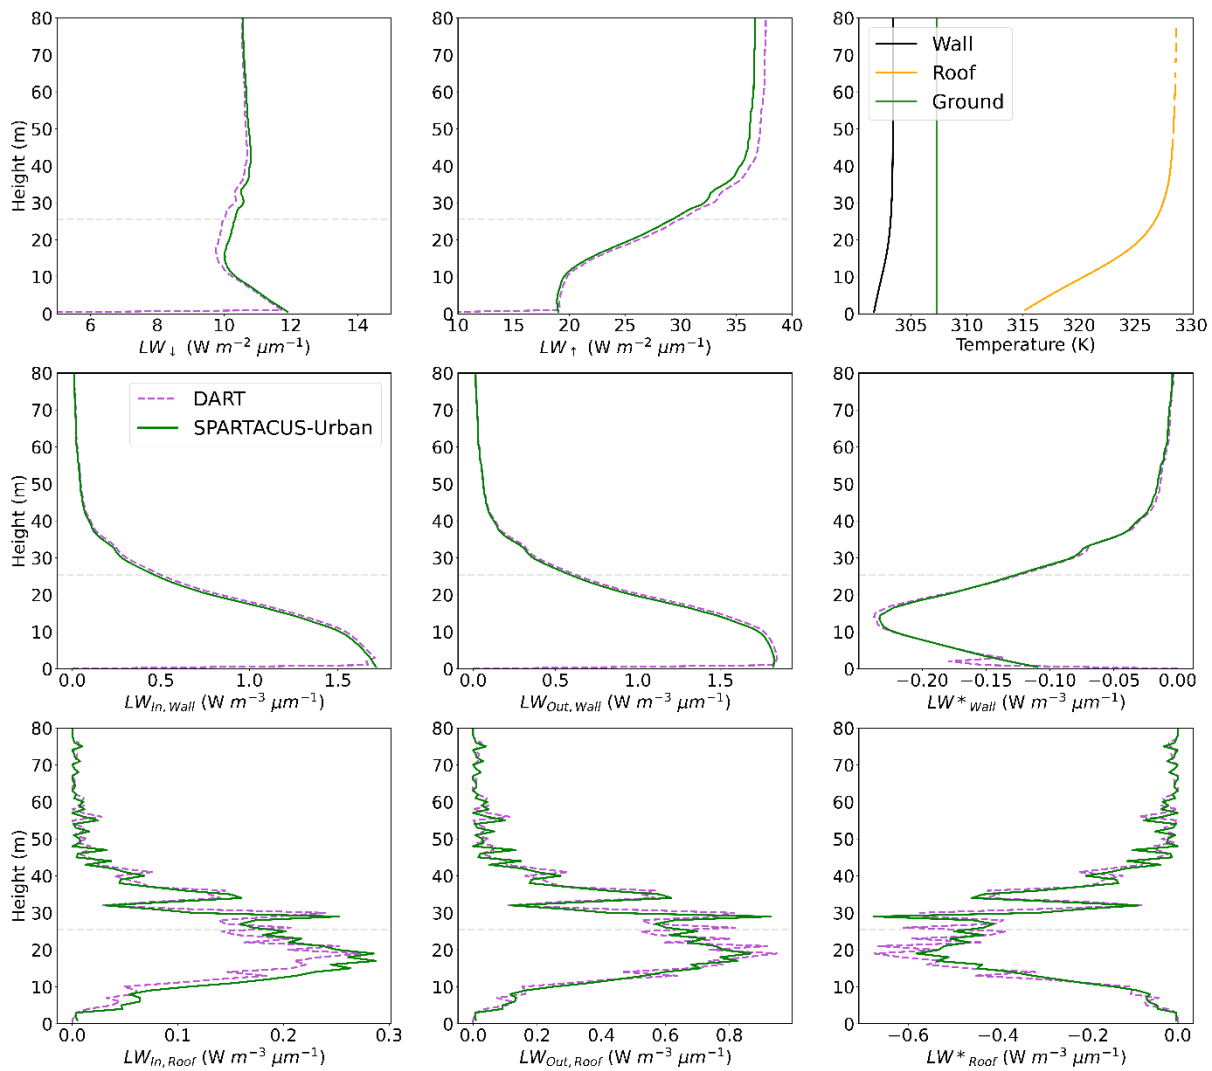

**Figure SM 11:** As Figure 7 but for 12:45 UTC

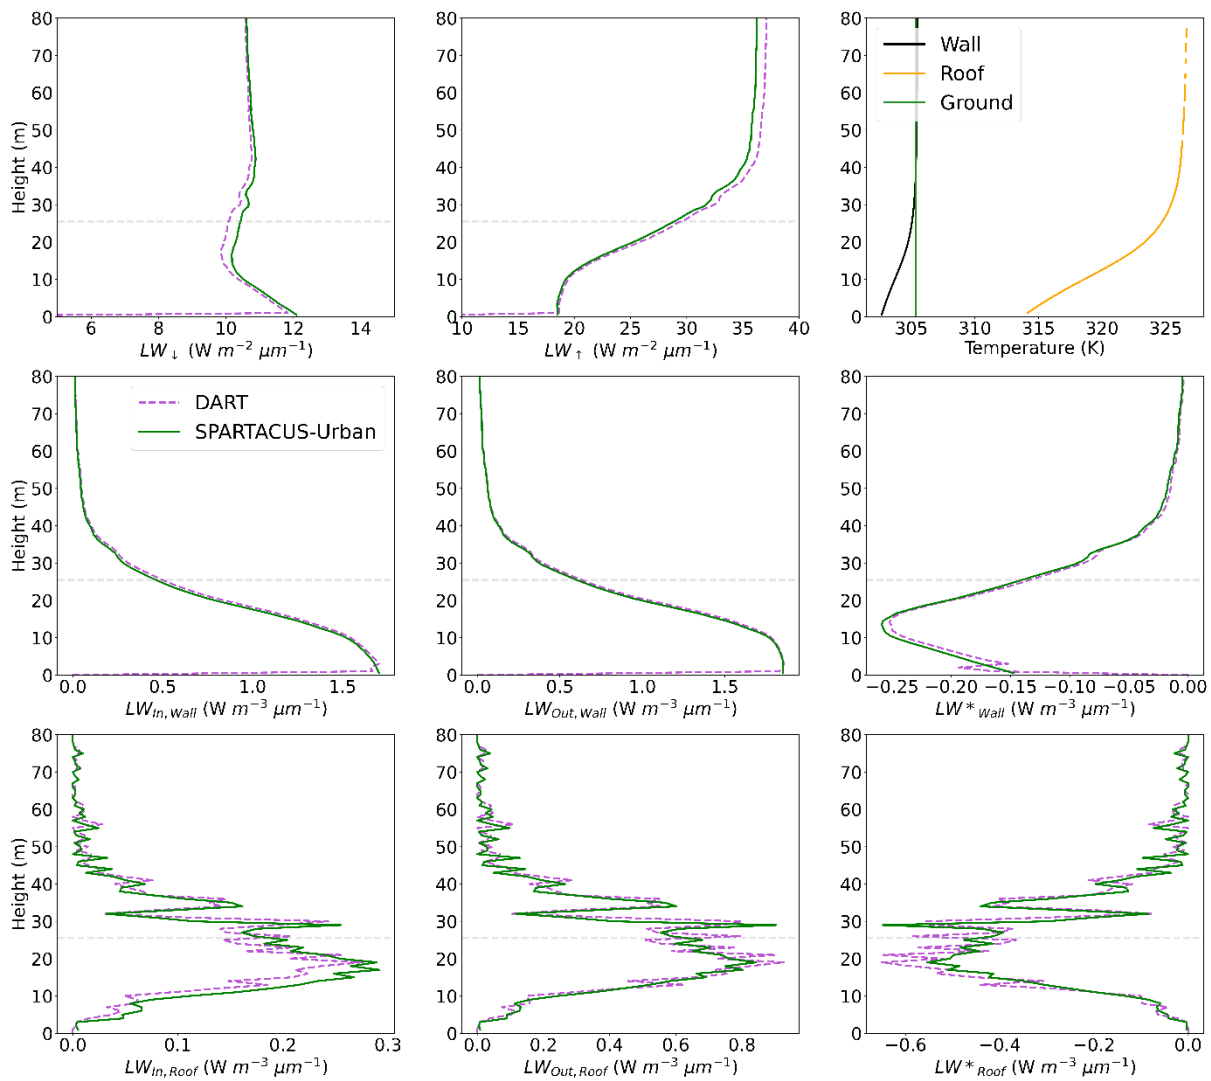

**Figure SM 12:** As Figure 7 but for 14:45 UTC

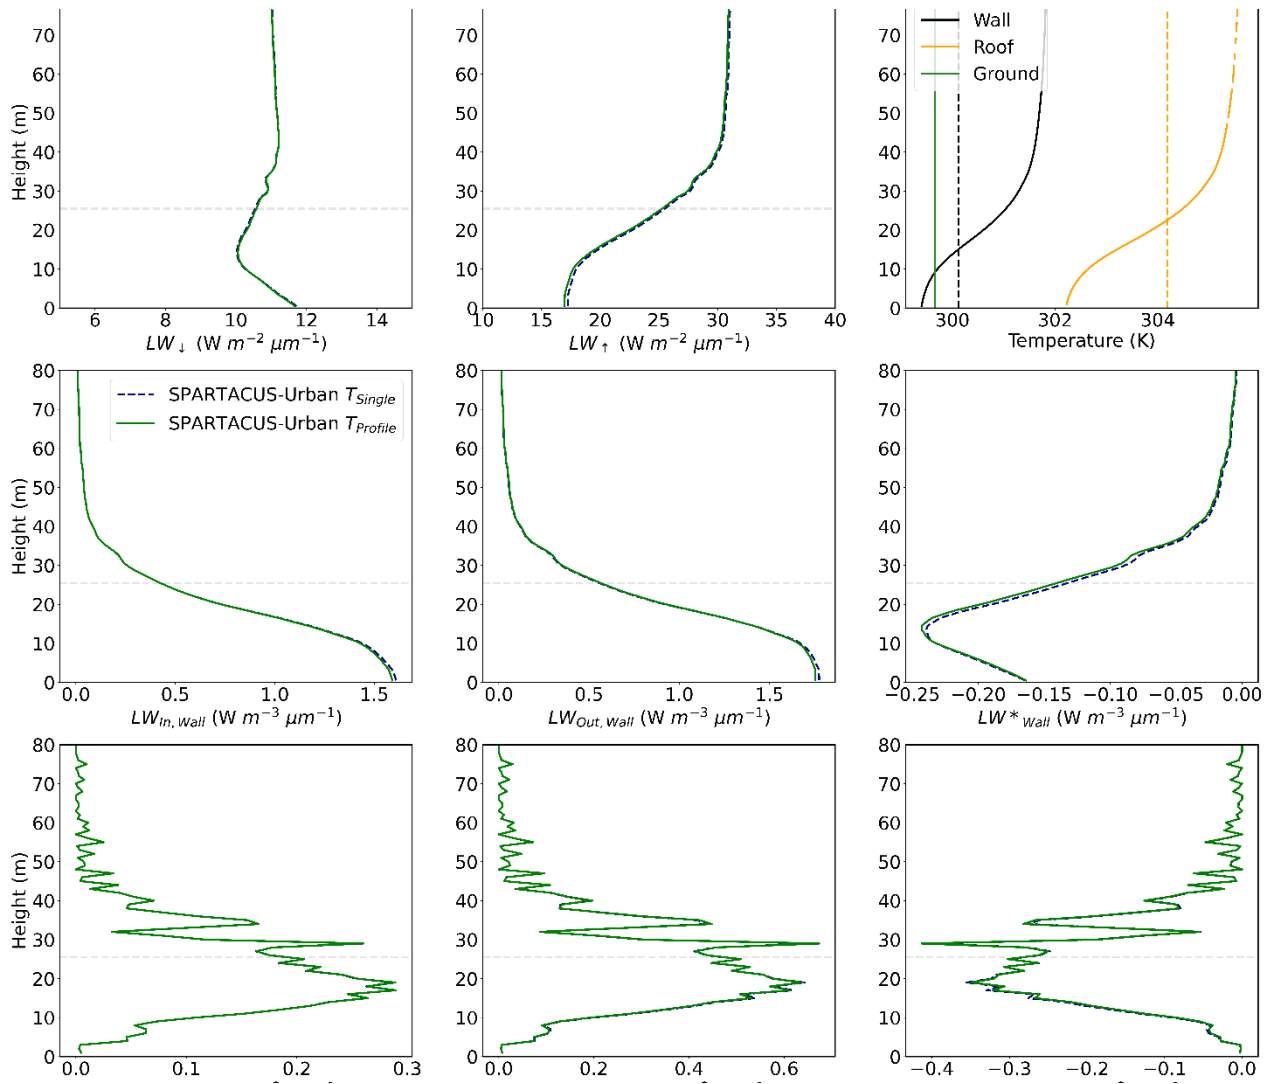

**Figure SM 13:** As Figure 9 but for 17:45 UTC

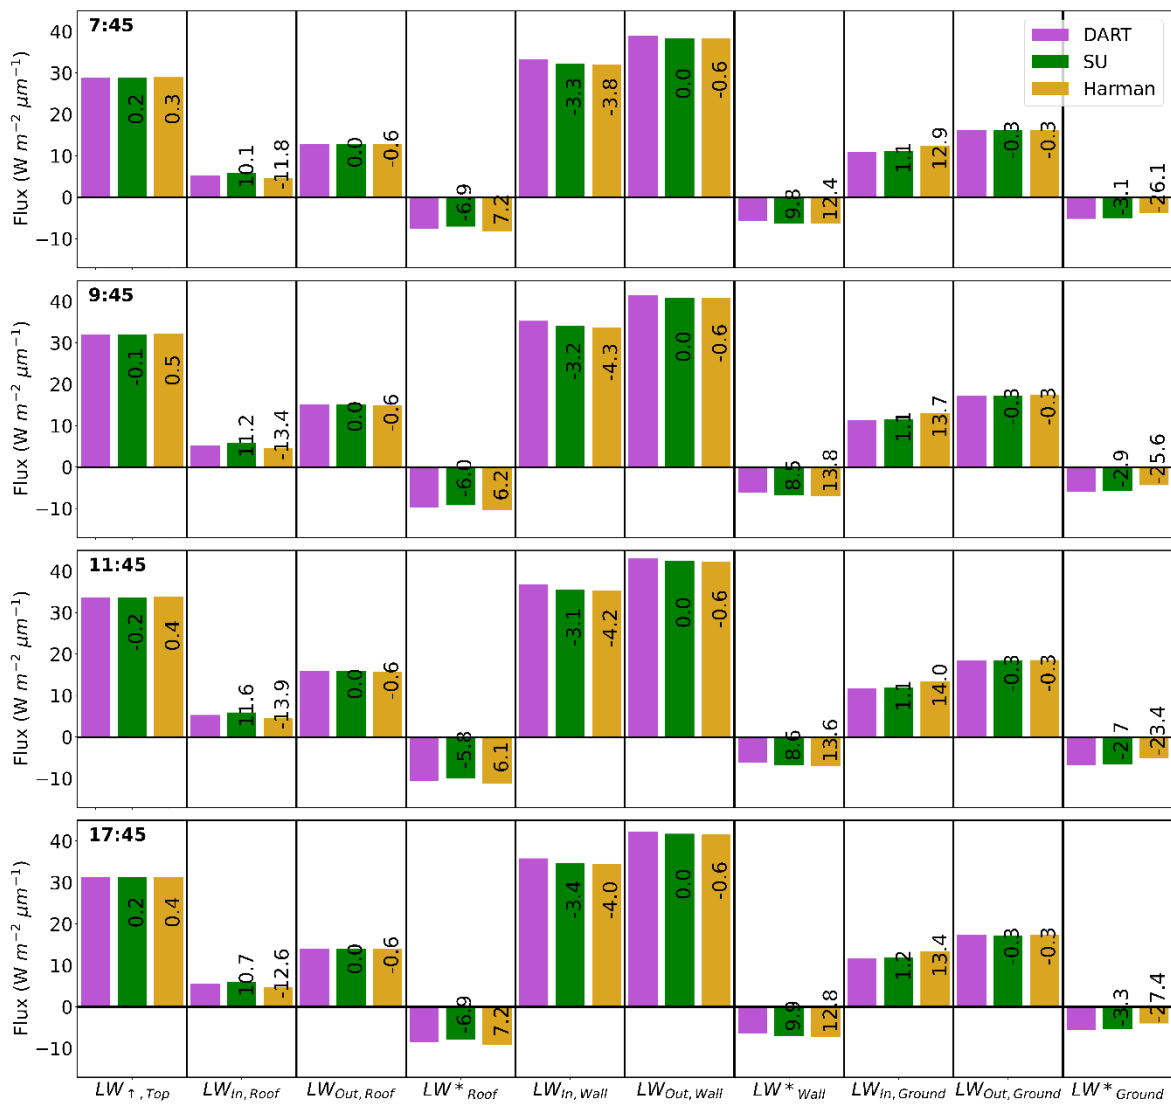

40 Figure SM 14: As Figure 10 but for all other time periods used.

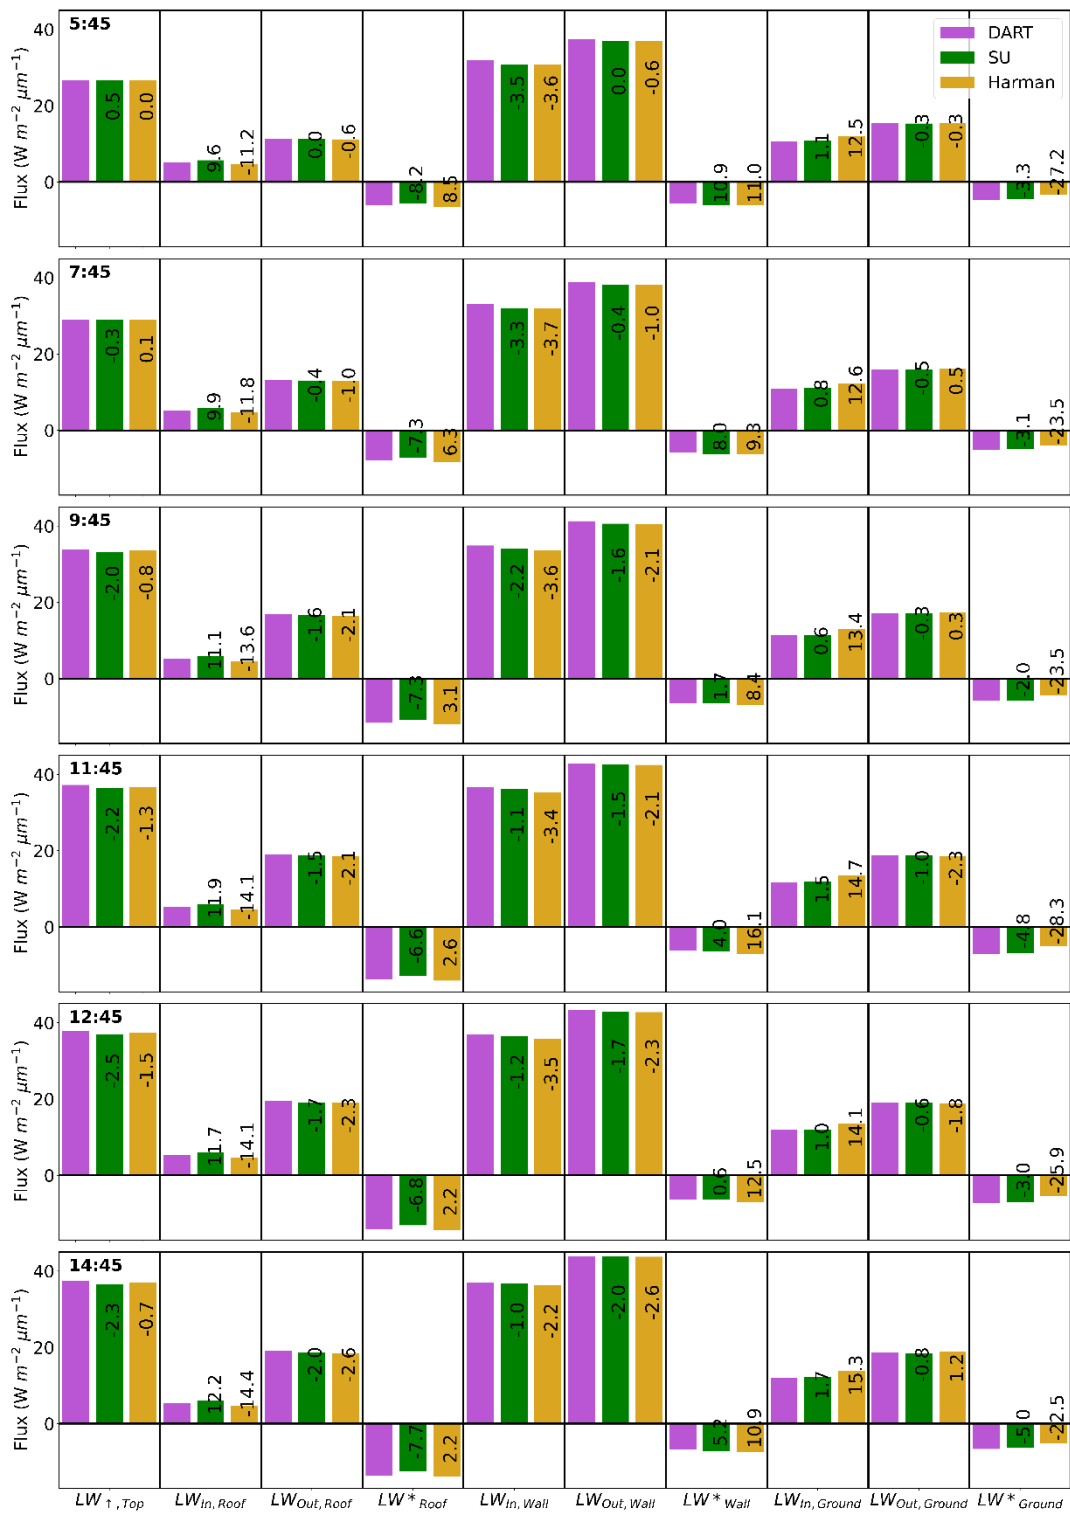

Figure SM 15: As Figure 11 but for all other time periods used.
